# Supplementary material
Source: PubMed Central journal article supplement (PMC4116294)
Supplement: NIHMS58861-supplement-1.pdf [file NIHMS58861-supplement-1.pdf]

## Supplementary Information

### Supplementary Note

#### Analysis of mutational context

As bases are paired across strands - A:T and G:C - the 12 possible mutation classes (A>T, A>C, A>G, T>C, T>G, T>A, G>A, G>T, G>C, C>A, C>T, C>G) can be collapsed to 6 classes where the mutated base is always considered as the pyrimidine i.e. A>C is equivalent to T>G. The bases immediately 5' and 3' of the mutated base are known to alter the rate at which differing mutational classes may occur at the base<sup>1,2</sup>. Each mutation class can therefore occur at one of 12 trinucleotide contexts, giving a total of 96 possible class-context combinations.

For each sample in the discovery cohort we extracted the trinucleotide context in which all somatic mutations occurred using the hg19 reference genome (<https://www.genome.ucsc.edu/>) and a custom perl script. The number of occurrences of each possible mutation-class-context combination was assessed. The prevalence of a specific mutation class at a given trinucleotide is determined both by the mutational processes active in a tumor and by the prevalence of the trinucleotide in the reference genome. To determine the fold enrichment due specifically to mutational processes affecting the tumor, we corrected for the relative prevalence of each trinucleotide within the mappable hg19 reference genome. To assess for novel mutational signatures heat maps were created and visually inspected following the protocol established in Nik-Zainal *et al.*<sup>1</sup>.

#### Selection of recurrently mutated target genes

Using SNV calls generated by STRELKA<sup>3</sup> (Illumina), genes were ordered by an estimated probability of frequency of mutation above a baseline, non-silent calling rate. Frequently mutated genes with a p-value  $<4 \times 10^{-5}$  (n=26 genes) were selected. We applied stringent filtering criteria to this cohort, removing those genes for which a mutation fell in a poorly mapping region (n=7, Supplementary Table 13) and those classified as uncharacterized (n=1), to enrich for functionally relevant mutation targets. We also removed a further two genes as members of large families we suspected were more likely to be passengers (OR10R2, C10orf71). A further two genes were removed as no mutations were identified in either in the discovery cohort under the adapted SNV filtering criteria (*PCDHGA11*, *HMX2*).

Additional genes were selected for validation based on a known association with carcinogenesis (*ABCB1*, *SMARCA4*, *UNC13C*, *CNTNAP5*, *MYO18B*, *MMP16*) and for their relevance to the NFκB pathway, known to be associated with the development of EAC (*TLR1*, *TLR4*, *TLR7*, *TLR9*, *MYD88*, *TRAF3*, *TRAF6*)<sup>4</sup>. In total 27 genes were taken forward to the primer design stage.

### **Immunohistochemistry for ARID1A**

Immunohistochemistry was performed on tissue microarrays containing tissue cores from 298 EACs. The ARID1A antibody - sigma, HPA005456 - was used at a dilution of 1:200. Staining was performed using a BONDMax autostainer (Leica, Milton Keynes, UK). Cores were scored as 0 (loss of staining), 1 (weak intensity staining), 2 (moderate intensity staining) or 3 (strong intensity staining).

### **Clonal analysis of 15 recurrently mutated genes in EAC**

1) Germline heterozygous sites in non-coding regions were identified in the following manner. A GATK walker identified all sites with Q30 base-quality coverage of the normal sample between 30 and 150 at least 12 reads supporting a variant and a B-allele frequency of at least 0.35.

2) For each chromosomal arm, FREEC counts for 10000 base windows were iteratively segmented (using fastseg) and GC corrected.

3) Those segments were then themselves segmented by the B-allele frequency of sites identified as germline-heterozygous.

4) All segments of length >1000 SNPs are plotted on a depth vs BAF plot and regions sought that will positively identify the coverage/copy number relationship.

5) For the segment containing a gene of interest, all models consisting of a single copy-number state mixed with normal diploid (AB) tissue are considered. The distribution of depth in the segment, distribution of B-allele frequencies for germline heterozygous SNPs for the segment, and distribution of allele frequency for somatic variants are all considered to determine if the copy-number state is feasible, and if so what proportion of cells carry the copy number mutation (cellularity). If no model provides a good fit, the tumour is presumed to be a mixture of subclonal copy-number mutations. This step identifies whether LOH has taken place at the location of the gene.

6) All major clusters of regions in the depth v BAF plot are considered in this manner to determine the maximum cellularity of any region in the sample: presumed to be the proportion of cells that are malignant. The cellularity of the copy number change of the gene of interest is then compared to judge whether it might be present in all tumour cells. Where this is not clear (as is often the case with lower cellularity tumours, older copy number changes, or changes with no allelic imbalance), the 'benefit of the doubt' is given to the mutation and it is called 'clonal'

7) Finally the mutation is considered relative to the copy number state and assessed as being clonal (or not)

### References to Supplementary Note

1. Nik-Zainal, S. et al. Mutational processes molding the genomes of 21 breast cancers. *Cell* **149**, 979-93 (2012).
2. Dulak, A.M. et al. Exome and whole-genome sequencing of esophageal adenocarcinoma identifies recurrent driver events and mutational complexity. *Nat Genet* **45**, 478-86 (2013).
3. Saunders, C.T. et al. Strelka: accurate somatic small-variant calling from sequenced tumor-normal sample pairs. *Bioinformatics* **28**, 1811-7 (2012).
4. Abdel-Latif, M.M. et al. NF-kappaB activation in esophageal adenocarcinoma: relationship to Barrett's metaplasia, survival, and response to neoadjuvant chemoradiotherapy. *Ann Surg* **239**, 491-500 (2004).

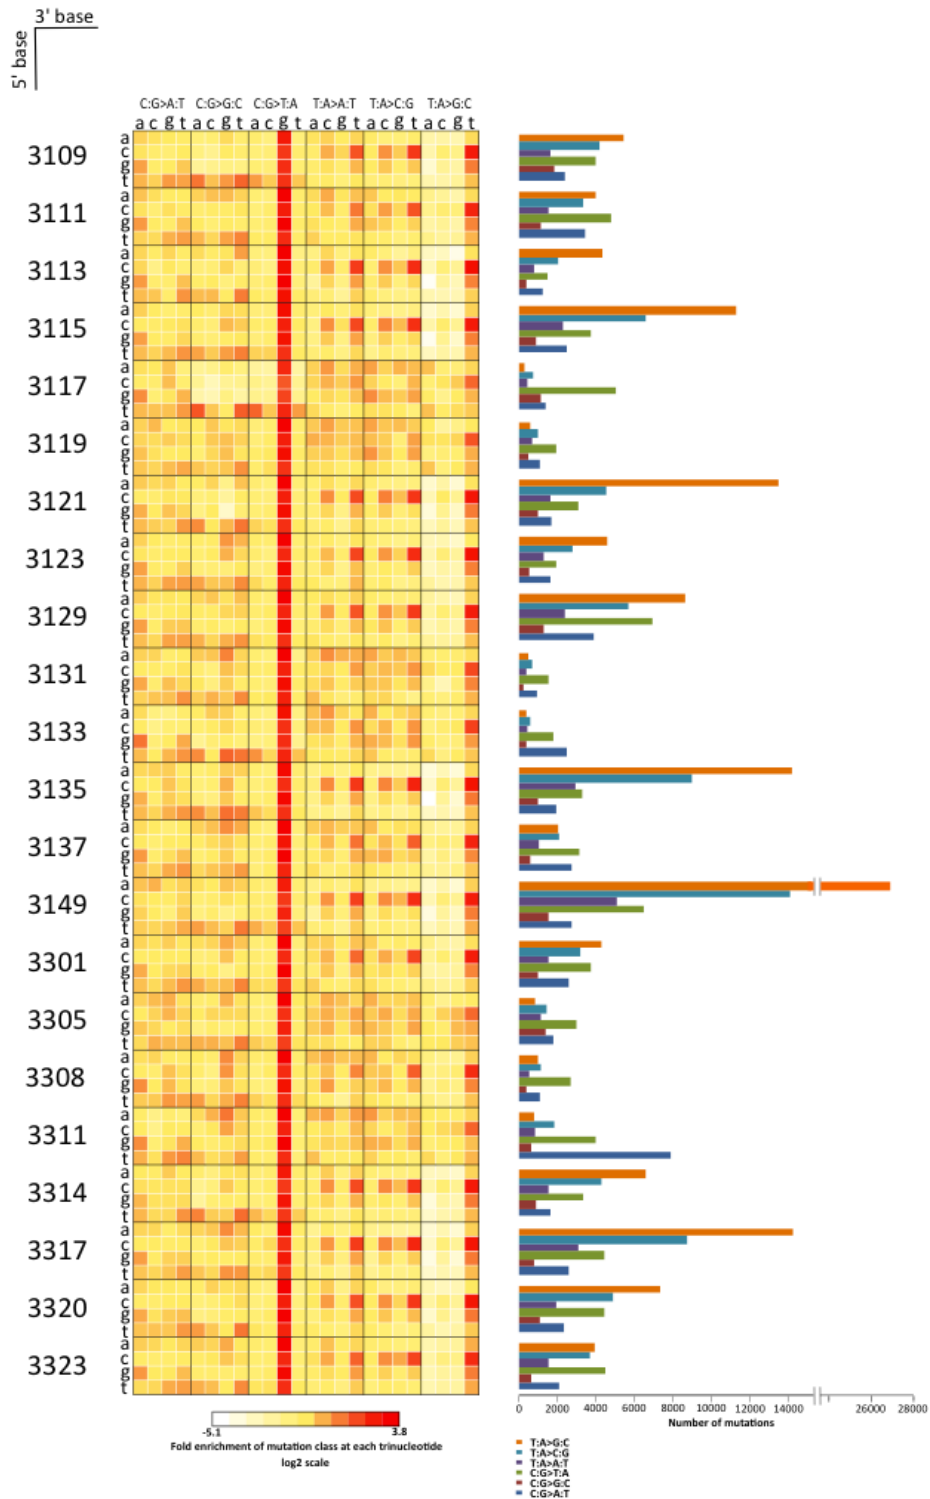

**Supplementary Figure 1:** Mutational patterns in the 22 discovery cohort EACs. The bar graph represents the total number of each possible mutation class change. The heat map displays the enrichment of each mutation class at any given trinucleotide context. For example the strong red strip running down the centre of the figure represents enrichment for C:G>T:A mutations at the XpCpG trinucleotide. Enrichment at the CTT trinucleotide can be seen for all 3 classes of thymidine mutation in the majority of samples.



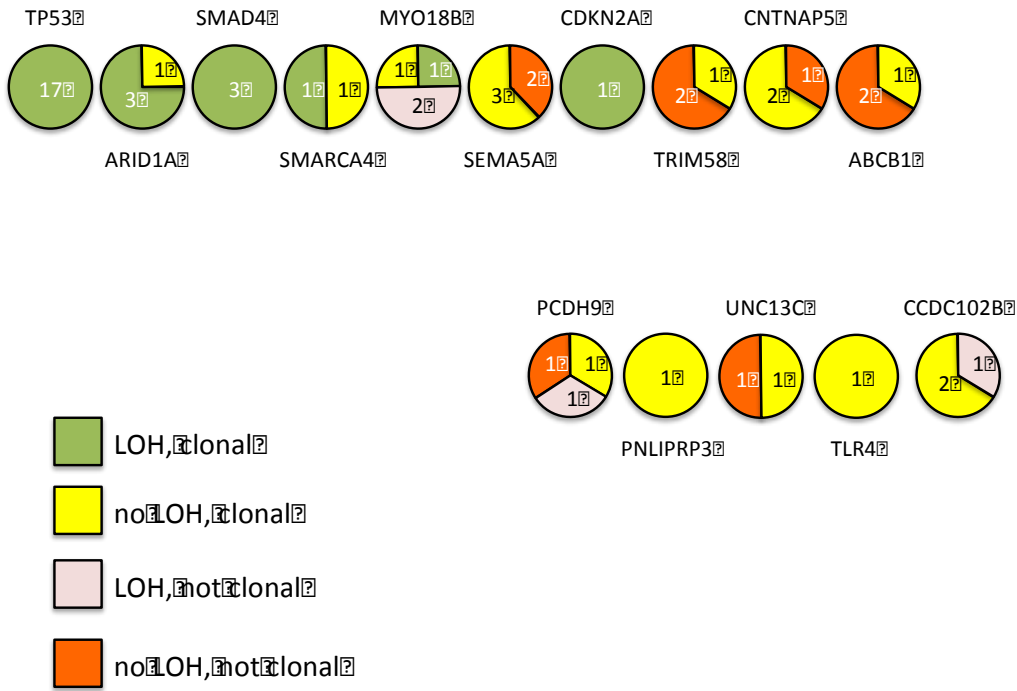

**Supplementary figure 3:** Clonal analysis of 15 recurrently-mutated genes in EAC

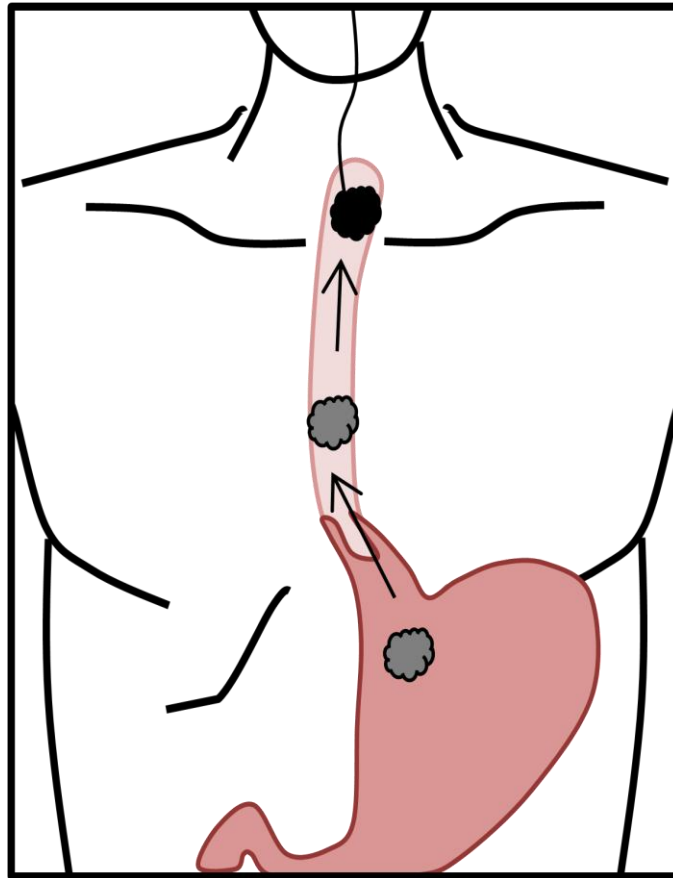

**Supplementary figure 4:** Schematic demonstrating Cytosponge™ sampling of cells from the top of the stomach, full length of the esophagus and oropharynx.

## Supplementary Tables

**Supplementary Table 1:** Demographic data of the 22 patients in the discovery cohort

| Case ID | Gender | Age (yrs) | Chemo treated | Differentiation | T | N | M | Stage | Alive/Deceased | Survival (months) | Normal sequenced |
|---------|--------|-----------|---------------|-----------------|---|---|---|-------|----------------|-------------------|------------------|
| 3109    | Female | 80        | No            | moderate        | 3 | 1 | X | IIIA  | deceased       | 9*                | Blood            |
| 3111    | Male   | 70        | No            | poor            | 1 | 0 | X | IB    | alive          | 30                | Blood            |
| 3113    | Male   | 63        | No            | poor            | 3 | 1 | X | IIIA  | alive          | 32                | Blood            |
| 3115    | Male   | 82        | No            | moderate        | 2 | 1 | X | IIB   | alive          | 33                | Blood            |
| 3117    | Male   | 78        | No            | moderate        | 3 | 2 | X | IIIB  | alive          | 43                | Normal esophagus |
| 3119    | Male   | 76        | No            | poor            | 3 | 2 | X | IIIB  | deceased       | 58*               | Normal esophagus |
| 3121    | Male   | 70        | No            | poor            | 3 | 1 | X | IIIA  | deceased       | 22                | Blood            |
| 3125    | Male   | 68        | Yes           | moderate        | 4 | 3 | X | IIIC  | deceased       | 27                | Blood            |
| 3129    | Male   | 72        | Yes           | poor            | 3 | 3 | X | IIIC  | alive          | 38                | Blood            |
| 3131    | Male   | 57        | Yes           | moderate        | 1 | 0 | X | IB    | alive          | 24                | Blood            |
| 3133    | Male   | 77        | Yes           | poor            | 3 | 2 | 1 | IV    | alive          | 47                | Blood            |
| 3135    | Male   | 53        | Yes           | poor            | 3 | 0 | X | IIB   | deceased       | 15                | Blood            |
| 3137    | Male   | 54        | Yes           | moderate        | 3 | 1 | 0 | IIIA  | deceased       | 34*               | Blood            |
| 3149    | Female | 63        | No            | moderate        | 3 | 0 | X | IIB   | deceased       | 26*               | Blood            |
| 3302    | Male   | 53        | Yes           | moderate        | 1 | 0 | X | IB    | alive          | 27                | Normal esophagus |
| 3305    | Male   | 75        | Yes           | moderate        | 2 | 1 | X | IIB   | alive          | 5                 | Normal esophagus |
| 3308    | Male   | 59        | Yes           | mod/poor        | 2 | 0 | X | IB    | deceased       | 23*               | Normal esophagus |
| 3311    | Female | 75        | Yes           | poor            | 1 | 1 | X | IIB   | alive          | 33                | Normal esophagus |
| 3314    | Female | 76        | Yes           | poor            | 3 | 2 | X | IIIB  | deceased       | 31*               | Normal esophagus |
| 3317    | Male   | 60        | Yes           | mod/poor        | 3 | 3 | X | IIIC  | deceased       | 9*                | Normal esophagus |
| 3320    | Male   | 59        | Yes           | mod/poor        | 3 | 2 | X | IIIB  | deceased       | 20*               | Normal esophagus |
| 3323    | Male   | 65        | Yes           | poor            | 2 | 0 | X | IIA   | alive          | 32                | Normal esophagus |

\* Death due to cancer recurrence



**Supplementary Table 2:** Coverage data for the discovery cohort

| <b>Metric</b>                     | <b>Normal Reference</b> | <b>Tumor</b>         |
|-----------------------------------|-------------------------|----------------------|
| Mapped sequence (Gb)              | 180 ( $\pm 15$ )        | 170 ( $\pm 17$ )     |
| Mean read depth                   | 67 ( $\pm 6$ )          | 63 ( $\pm 6$ )       |
| Assembled genome covered (%)      | 99.9 ( $\pm 0.03$ )     | 99.9 ( $\pm 0.02$ )  |
| 10x or greater genome covered (%) | 99.7 ( $\pm 0.08$ )     | 99.7 ( $\pm 0.07$ )  |
| 30x or greater genome covered (%) | 98.9 ( $\pm 0.48$ )     | 98.3 ( $\pm 0.96$ )  |
| 50x or greater genome covered (%) | 91.5 ( $\pm 7.21$ )     | 79.8 ( $\pm 10.51$ ) |

\*Data presented as median (interquartile range)

**Supplementary Table 3: Demographics of the 90 EAC patients in the validation cohort**

| Case ID | Gender | Age (yrs) | Chemo treated | Differentiation | Stage |     |     | Alive/Deceased | Survival (months) |     |
|---------|--------|-----------|---------------|-----------------|-------|-----|-----|----------------|-------------------|-----|
|         |        |           |               |                 | T     | N   | M   |                |                   |     |
| EAC001  | Male   | 33        | No            | mod/poor        | 2     | 0   | X   | IB             | Alive             | 58  |
| EAC002  | Male   | 67        | No            | mod/poor        | 4     | 3   | 0   | IIIC           | Deceased          | 14* |
| EAC003  | Male   | 54        | No            | well/mod        | 4     | 3   | 1   | IV             | Alive             | 59  |
| EAC004  | Female | 72        | No            | mod/poor        | 4     | 1   | 0   | IIIC           | Deceased          | 23* |
| EAC005  | Male   | 62        | No            | moderate        | 3     | 3   | X   | IIIC           | Deceased          | 6*  |
| EAC006  | Male   | 57        | No            | poor            | 3     | 1   | X   | IIIA           | Deceased          | 38* |
| EAC007  | Male   | 66        | No            | moderate        | 3     | 1   | X   | IIIA           | Deceased          | 6*  |
| EAC008  | Male   | 77        | No            | N/A             | 2     | 0   | X   | N/A            | Deceased          | 11  |
| EAC009  | Male   | 73        | No            | poor            | 3     | 0   | X   | IIB            | Deceased          | 17* |
| EAC010  | Female | 62        | No            | N/A             | 2     | 0   | 0   | N/A            | Alive             | 45  |
| EAC011  | Male   | 60        | No            | mod/poor        | 3     | 0   | X   | IIB            | Deceased          | 24* |
| EAC012  | Male   | 64        | No            | poor            | 4     | 1   | X   | IIIC           | Deceased          | 7*  |
| EAC013  | Male   | 56        | No            | poor            | 3     | 1   | 1   | IV             | Alive             | 2   |
| EAC014  | Male   | 74        | No            | moderate        | 4     | 0   | 0   | IIIC           | Deceased          | 12* |
| EAC015  | Male   | 41        | No            | moderate        | 3     | 3   | 0   | IIIC           | Deceased          | 21* |
| EAC016  | Male   | 61        | No            | N/A             | X     | 1   | 1   | IV             | Deceased          | 16* |
| EAC017  | Male   | 63        | Yes           | mod/poor        | 3     | 0   | X   | IIB            | Deceased          | 10* |
| EAC018  | Male   | 66        | Yes           | mod/poor        | 3     | 2   | X   | IIIB           | Deceased          | 29* |
| EAC019  | Male   | 54        | Yes           | poor            | 3     | 2   | X   | IIIB           | Deceased          | 12* |
| EAC020  | Male   | 77        | No            | mod/poor        | 3     | 2   | 0   | IIIB           | Deceased          | 20* |
| EAC021  | Male   | 32        | Yes           | N/A             | 3     | 0   | X   | IIB            | Alive             | 25  |
| EAC022  | Male   | 55        | Yes           | poor            | 3     | 0   | X   | IIB            | Deceased          | 12* |
| EAC023  | Male   | 79        | No            | moderate        | 2     | 1   | 0   | IIB            | Deceased          | 2   |
| EAC024  | Male   | 74        | No            | moderate        | 3     | 0   | 0   | IIB            | Alive             | 21  |
| EAC025  | Male   | 58        | No            | moderate        | 3     | 3   | 0   | IIIC           | Deceased          | 18  |
| EAC026  | Male   | 66        | Yes           | poor            | 3     | 2   | 0   | IIIB           | Alive             | 24  |
| EAC027  | Male   | 82        | No            | well/mod        | 3     | 0   | 0   | IIB            | Alive             | 19  |
| EAC028  | Male   | 67        | Yes           | moderate        | 3     | 2   | X   | IIIB           | Alive             | 48  |
| EAC029  | Male   | 78        | Yes           | moderate        | 2     | 0   | 0   | IB             | Alive             | 20  |
| EAC030  | Female | 75        | No            | moderate        | 1b    | 0   | X   | IA             | Alive             | 15  |
| EAC031  | Male   | 81        | No            | well/mod        | 3     | 1   | 0   | IIIA           | Alive             | 20  |
| EAC032  | Male   | 70        | Yes           | well/mod        | 1     | 0   | 0   | IB             | Alive             | 17  |
| EAC033  | Male   | 64        | Yes           | moderate        | 1     | 0   | X   | IA             | Deceased          | 1*  |
| EAC034  | Male   | 76        | No            | poor            | 3     | 1   | 0   | IIIA           | Deceased          | 11* |
| EAC035  | Male   | 69        | No            | poor            | X     | 1   | 0   | N/A            | Alive             | 9   |
| EAC036  | Male   | 67        | No            | poor            | X     | 2   | 1   | IV             | Deceased          | 5*  |
| EAC037  | Male   | 62        | Yes           | moderate        | 3     | 3   | X   | IIIC           | Alive             | 23  |
| EAC038  | Male   | 73        | Yes           | poor            | 2     | 0   | X   | IB             | Alive             | 22  |
| EAC039  | Male   | 66        | Yes           | moderate        | 2     | 0   | 0   | IB             | Alive             | 22  |
| EAC040  | Male   | 62        | Yes           | poor            | 3     | 2   | 0   | IIIB           | Alive             | 20  |
| EAC041  | Male   | 62        | Yes           | poor            | 3     | 1   | 0   | IIIA           | Alive             | 14  |
| EAC042  | Male   | 69        | Yes           | poor            | 3     | 3   | 0   | IIIC           | Alive             | 24  |
| EAC043  | Female | 67        | No            | poor            | 2     | 0   | 0   | IB             | Alive             | 134 |
| EAC044  | Male   | 74        | No            | poor            | 3     | 2   | 0   | IIIB           | Deceased          | 53  |
| EAC045  | Male   | N/A       | No            | poor            | N/A   | N/A | N/A | N/A            | N/A               | N/A |
| EAC046  | Female | 69        | No            | poor            | 2     | 2   | 0   | IIIA           | Deceased          | 5   |
| EAC047  | Male   | 63        | No            | poor            | 3     | 1   | 0   | IIIA           | Deceased          | 13* |
| EAC048  | Male   | 52        | No            | poor            | 3     | 2   | 0   | IIIB           | Deceased          | 5*  |
| EAC049  | Male   | 71        | No            | poor            | 2     | 1   | 0   | IIB            | Alive             | 73  |

|        |        |     |     |          |     |     |     |      |          |     |
|--------|--------|-----|-----|----------|-----|-----|-----|------|----------|-----|
| EAC050 | Male   | 43  | No  | poor     | 3   | 3   | 0   | IIIC | Deceased | 35* |
| EAC051 | Female | N/A | No  | poor     | N/A | N/A | N/A | N/A  | N/A      | N/A |
| EAC052 | Female | 74  | No  | poor     | 3   | 2   | 0   | IIIB | Deceased | 27* |
| EAC053 | Female | N/A | No  | moderate | N/A | N/A | N/A | N/A  | N/A      | N/A |
| EAC054 | Male   | 56  | No  | moderate | 3   | 1   | 0   | IIIA | Deceased | 6*  |
| EAC055 | Male   | 56  | No  | moderate | 1   | 0   | 0   | IA   | Alive    | 77  |
| EAC056 | Female | 56  | No  | mod/poor | 3   | 3   | 0   | IIIC | Deceased | 8*  |
| EAC057 | N/A    | N/A | N/A | mod/poor | N/A | N/A | N/A | N/A  | N/A      | N/A |
| EAC058 | Male   | 50  | No  | moderate | 3   | 2   | 0   | IIIB | Deceased | 1*  |
| EAC059 | N/A    | N/A | N/A | mod/poor | N/A | N/A | N/A | N/A  | N/A      | N/A |
| EAC060 | Male   | 79  | No  | well     | 2   | 1   | 0   | IIB  | Deceased | 38* |
| EAC061 | Male   | 81  | No  | poor     | 3   | 3   | 0   | IIIC | Deceased | 15  |
| EAC062 | Female | 44  | No  | poor     | 3   | 0   | 0   | IIB  | Deceased | 92  |
| EAC063 | Male   | 57  | Yes | poor     | 3   | 3   | 0   | IIIC | Deceased | 2*  |
| EAC064 | Male   | 76  | No  | poor     | 3   | 2   | X   | IIIB | N/A      | N/A |
| EAC065 | Male   | 75  | Yes | poor     | 3   | 3   | X   | IIIC | Deceased | 2*  |
| EAC066 | Female | 69  | No  | poor     | 3   | 2   | X   | IIIB | Deceased | 12* |
| EAC067 | Male   | 70  | Yes | moderate | 3   | 2   | 0   | IIIB | Deceased | 38* |
| EAC068 | Male   | 55  | Yes | poor     | 3   | 1   | X   | IIIA | Deceased | 21* |
| EAC069 | Male   | 67  | Yes | N/A      | 2b  | 0   | X   | N/A  | Alive    | 50  |
| EAC070 | Male   | 52  | Yes | poor     | 3   | 3   | X   | IIIC | Deceased | 7*  |
| EAC071 | Male   | 71  | Yes | poor     | 3   | 0   | X   | IIB  | Deceased | 21* |
| EAC072 | Male   | 53  | Yes | moderate | 2   | 1   | 0   | IIB  | Deceased | 12* |
| EAC073 | Male   | 73  | Yes | moderate | 3   | 1   | X   | IIIA | Deceased | 23  |
| EAC074 | Male   | 70  | Yes | poor     | 3   | 0   | x   | IIB  | Deceased | 13* |
| EAC075 | Male   | 83  | Yes | moderate | 3   | 2   | X   | IIIB | Deceased | 21* |
| EAC076 | Female | 66  | Yes | moderate | 3   | 1   | X   | IIIA | Deceased | 15* |
| EAC077 | Male   | 66  | Yes | moderate | 3   | 2   | X   | IIIB | Alive    | 34  |
| EAC078 | Female | 70  | No  | poor     | 3   | 2   | X   | IIIB | Alive    | 27  |
| EAC079 | Male   | 75  | No  | well/mod | 1   | 0   | X   | IA   | Alive    | 27  |
| EAC080 | Male   | 76  | Yes | poor     | 3   | 1   | X   | IIIA | Deceased | 1   |
| EAC081 | Male   | 63  | Yes | moderate | 3   | 1   | X   | IIIA | Alive    | 24  |
| EAC082 | Male   | 67  | No  | poor     | 1   | 0   | X   | IA   | Alive    | 24  |
| EAC083 | Male   | 74  | Yes | poor     | 3   | 3   | X   | IIIC | Deceased | 12  |
| EAC084 | Male   | 56  | No  | moderate | 1b  | 0   | X   | IA   | Alive    | 18  |
| EAC085 | Male   | 75  | Yes | moderate | 3   | 1   | 0   | IIIA | Deceased | 11* |
| EAC086 | Male   | 79  | Yes | poor     | 3   | 3   | 0   | IIIC | Alive    | 23  |
| EAC087 | Male   | 65  | Yes | moderate | 1   | 0   | X   | IA   | Deceased | 9*  |
| EAC088 | Female | 80  | No  | moderate | 3   | 3   | X   | IIIC | Alive    | 14  |
| EAC089 | Male   | 70  | No  | moderate | 2   | 2   | X   | IIIA | Deceased | 6*  |
| EAC090 | Male   | 75  | No  | N/A      | 2   | 0   | 0   | IB   | Alive    | 4   |

\* Cause of death related to cancer

**Supplementary Table 4: Validation using external data.** The published mutations of Dulak et al. (supplementary table 6) were interrogated for the fifteen genes that were mutated in four or more samples of our data (see Figure 2). The percentage of samples carrying a mutation in that data set is compared to the percentage carrying a mutation in ours. For each sample in the Dulak *et al.* data set, the allele frequencies of the observed mutations were ranked, and the percentile associated with the genes of interest noted. The median such percentile for all samples carrying that gene is noted (e.g. a percentile of 100 would mean that the mutation in the gene always had the highest allele frequency in a given sample). The table is ranked by this statistic.

| Gene     | Dulak et al.                |                     | Weaver <i>et al</i> |
|----------|-----------------------------|---------------------|---------------------|
|          | Allele Frequency Percentile | Mutation Percentage | Mutation Percentage |
| TP53     | 92.5                        | 73.1                | 68.8                |
| SMAD4    | 84.7                        | 9.0                 | 11.6                |
| CCDC102B | 83.2                        | 2.1                 | 3.6                 |
| CDKN2A   | 83.1                        | 13.8                | 8.0                 |
| ARID1A   | 78.2                        | 9.7                 | 11.6                |
| SMARCA4  | 72.5                        | 6.9                 | 6.3                 |
| SEMA5A   | 67.2                        | 8.3                 | 8.0                 |
| TRIM58   | 62.6                        | 2.8                 | 6.3                 |
| MYO18B   | 57.1                        | 3.4                 | 11.6                |
| TLR4     | 56.8                        | 6.2                 | 3.6                 |
| CNTNAP5  | 49.7                        | 11.7                | 6.3                 |
| UNC13C   | 48.3                        | 8.3                 | 4.5                 |
| PCDH9    | 48.1                        | 11.0                | 6.3                 |
| ABCB1    | 28.7                        | 5.5                 | 6.3                 |
| PNLIPRP3 | 28.4                        | 4.8                 | 4.5                 |

**Supplementary Table 5:** Point mutations identified in the never-dysplastic Barrett's esophagus and high-grade dysplasia (HGD) samples.

| Name   | Diagnosis | Gene     | Chromosome | Position  | Ref | Alt | Mutation type   |
|--------|-----------|----------|------------|-----------|-----|-----|-----------------|
| HGD_01 | HGD       | TP53     | chr17      | 7574003   | G   | A   | nonsense        |
| HGD_02 | HGD       | TLR4     | chr9       | 120476906 | C   | A   | missense        |
| HGD_02 | HGD       | TP53     | chr17      | 7579316   | -   | A   | Frame_shift_INS |
| HGD_03 | HGD       | CDKN2A   | chr9       | 21971111  | G   | A   | missense        |
| HGD_03 | HGD       | TP53     | chr17      | 7578406   | C   | T   | missense        |
| HGD_04 | HGD       | TP53     | chr17      | 7577551   | C   | T   | missense        |
| HGD_05 | HGD       | ARID1A   | chr1       | 27105550  | C   | T   | nonsense        |
| HGD_05 | HGD       | MYO18B   | chr22      | 26157079  | T   | G   | missense        |
| HGD_05 | HGD       | TP53     | chr17      | 7577547   | C   | G   | missense        |
| HGD_06 | HGD       | CNTNAP5  | chr2       | 125192118 | A   | G   | missense        |
| HGD_07 | HGD       | ARID1A   | chr1       | 27106025  | G   | A   | missense        |
| HGD_08 | HGD       | HMX2     | chr10      | 124908019 | C   | T   | missense        |
| HGD_08 | HGD       | MYO18B   | chr22      | 26423117  | G   | A   | missense        |
| HGD_08 | HGD       | TP53     | chr17      | 7577120   | C   | T   | missense        |
| HGD_09 | HGD       | ARID1A   | chr1       | 27107084  | G   | A   | missense        |
| HGD_09 | HGD       | CDKN2A   | chr9       | 21974695  | -   | T   | Frame_shift_INS |
| HGD_10 | HGD       | TLR4     | chr9       | 120475722 | A   | G   | missense        |
| HGD_10 | HGD       | TP53     | chr17      | 7577536   | T   | C   | missense        |
| HGD_10 | HGD       | UNC13C   | chr15      | 54685369  | G   | T   | missense        |
| HGD_11 | HGD       | TP53     | chr17      | 7578526   | C   | A   | missense        |
| HGD_12 | HGD       | ARID1A   | chr1       | 27087503  | C   | T   | nonsense        |
| HGD_12 | HGD       | TP53     | chr17      | 7578205   | C   | G   | missense        |
| HGD_13 | HGD       | PCDHGA11 | chr5       | 140803181 | A   | C   | missense        |
| HGD_13 | HGD       | SMARCA4  | chr19      | 11134230  | C   | T   | missense        |
| HGD_13 | HGD       | TP53     | chr17      | 7577538   | C   | T   | missense        |
| HGD_13 | HGD       | ARID1A   | chr1       | 27056160  | -   | A   | Frame_shift_INS |
| HGD_13 | HGD       | CDKN2A   | chr9       | 21974695  | -   | T   | Frame_shift_INS |
| HGD_14 | HGD       | ABCB1    | chr7       | 87183086  | T   | G   | missense        |
| HGD_15 | HGD       | ARID1A   | chr1       | 27105946  | G   | T   | nonsense        |
| HGD_15 | HGD       | TLR4     | chr9       | 120475115 | T   | G   | missense        |
| HGD_15 | HGD       | TP53     | chr17      | 7578479   | G   | A   | missense        |
| HGD_16 | HGD       | HMX2     | chr10      | 124908015 | C   | T   | missense        |
| HGD_16 | HGD       | TP53     | chr17      | 7577514   | TGA | -   | Inframe_DEL     |
| HGD_17 | HGD       | TP53     | chr17      | 7574003   | G   | A   | nonsense        |
| HGD_18 | HGD       | TP53     | chr17      | 7577547   | C   | T   | missense        |
| HGD_19 | HGD       | CNTNAP5  | chr2       | 125521646 | T   | A   | missense        |
| HGD_20 | HGD       | CNTNAP5  | chr2       | 125530484 | A   | G   | missense        |
| HGD_20 | HGD       | TP53     | chr17      | 7579373   | C   | G   | missense        |
| HGD_21 | HGD       | ABCB1    | chr7       | 87196200  | A   | G   | missense        |
| HGD_21 | HGD       | MYO18B   | chr22      | 26157069  | T   | C   | missense        |
| HGD_21 | HGD       | MYO18B   | chr22      | 26423567  | C   | G   | missense        |
| HGD_22 | HGD       | UNC13C   | chr15      | 54614234  | A   | T   | missense        |
| HGD_23 | HGD       | ARID1A   | chr1       | 27089462  | A   | C   | splice_site     |
| HGD_23 | HGD       | TP53     | chr17      | 7577121   | G   | A   | missense        |
| HGD_23 | HGD       | UNC13C   | chr15      | 54919152  | G   | T   | missense        |
| HGD_24 | HGD       | TLR4     | chr9       | 120476598 | G   | A   | missense        |
| HGD_24 | HGD       | TP53     | chr17      | 7578406   | C   | T   | missense        |

|         |                     |          |       |           |      |    |                 |
|---------|---------------------|----------|-------|-----------|------|----|-----------------|
| HGD_25  | HGD                 | TP53     | chr17 | 7579317   | AGTC | -  | Frame_shift_DEL |
| HGD_26  | HGD                 | TP53     | chr17 | 7577120   | C    | T  | missense        |
| HGD_27  | HGD                 | MYO18B   | chr22 | 26247524  | C    | T  | missense        |
| HGD_27  | HGD                 | TP53     | chr17 | 7578263   | G    | A  | nonsense        |
| HGD_28  | HGD                 | ARID1A   | chr1  | 27057685  | C    | T  | nonsense        |
| HGD_28  | HGD                 | CDKN2A   | chr9  | 21971035  | T    | C  | missense        |
| HGD_28  | HGD                 | TLR4     | chr9  | 120475402 | G    | T  | missense        |
| HGD_29  | HGD                 | TP53     | chr17 | 7578280   | G    | A  | missense        |
| HGD_30  | HGD                 | SMARCA4  | chr19 | 11152161  | A    | T  | missense        |
| HGD_30  | HGD                 | TP53     | chr17 | 7578443   | A    | G  | missense        |
| HGD_30  | HGD                 | TP53     | chr17 | 7577099   | C    | T  | missense        |
| HGD_30  | HGD                 | ARID1A   | chr1  | 27056192  | G    | -  | Frame_shift_DEL |
| HGD_31  | HGD                 | PCDH9    | chr13 | 67801846  | T    | C  | missense        |
| HGD_31  | HGD                 | TP53     | chr17 | 7574018   | G    | A  | missense        |
| HGD_32  | HGD                 | TP53     | chr17 | 7577114   | C    | A  | missense        |
| HGD_33  | HGD                 | TP53     | chr17 | 7574003   | G    | A  | nonsense        |
| HGD_34  | HGD                 | TP53     | chr17 | 7577538   | C    | T  | missense        |
| HGD_35  | HGD                 | CDKN2A   | chr9  | 21971029  | C    | T  | nonsense        |
| HGD_35  | HGD                 | SMARCA4  | chr19 | 11132428  | G    | A  | missense        |
| HGD_35  | HGD                 | TP53     | chr17 | 7578406   | C    | T  | missense        |
| HGD_36  | HGD                 | CNTNAP5  | chr2  | 124979372 | T    | C  | missense        |
| HGD_36  | HGD                 | TP53     | chr17 | 7578403   | C    | A  | missense        |
| HGD_37  | HGD                 | CNTNAP5  | chr2  | 124979372 | T    | G  | missense        |
| HGD_37  | HGD                 | CNTNAP5  | chr2  | 125204408 | C    | T  | missense        |
| HGD_37  | HGD                 | TP53     | chr17 | 7578190   | T    | C  | missense        |
| HGD_37  | HGD                 | TP53     | chr17 | 7574003   | G    | A  | nonsense        |
| HGD_38  | HGD                 | TP53     | chr17 | 7577538   | C    | T  | missense        |
| HGD_39  | HGD                 | CDKN2A   | chr9  | 21971186  | G    | A  | nonsense        |
| HGD_39  | HGD                 | MYF6     | chr12 | 81101952  | G    | A  | missense        |
| HGD_39  | HGD                 | TP53     | chr17 | 7577511   | A    | C  | missense        |
| NDBE_01 | Never-dysplastic BE | UNC13C   | chr15 | 54306592  | AGC  | -  | Inframe_Del     |
| NDBE_02 | Never-dysplastic BE | CNTNAP5  | chr2  | 125555838 | T    | G  | missense        |
| NDBE_02 | Never-dysplastic BE | UNC13C   | chr15 | 54614286  | A    | C  | missense        |
| NDBE_03 | Never-dysplastic BE | CNTNAP5  | chr2  | 124999875 | A    | G  | missense        |
| NDBE_04 | Never-dysplastic BE | TP53     | chr17 | 7577120   | C    | T  | missense        |
| NDBE_05 | Never-dysplastic BE | UNC13C   | chr15 | 54306592  | AGC  | -  | Inframe_Del     |
| NDBE_06 | Never-dysplastic BE | ARID1A   | chr1  | 27106373  | C    | T  | missense        |
| NDBE_06 | Never-dysplastic BE | ARID1A   | chr1  | 27023239  | -    | A  | Frame_shift_INS |
| NDBE_07 | Never-dysplastic BE | CNTNAP5  | chr2  | 125627319 | T    | A  | missense        |
| NDBE_07 | Never-dysplastic BE | MYO18B   | chr22 | 26423082  | G    | A  | missense        |
| NDBE_07 | Never-dysplastic BE | ARID1A   | chr1  | 27100943  | -    | CG | Frame_shift_INS |
| NDBE_08 | Never-dysplastic BE | ABCB1    | chr7  | 87145865  | G    | T  | missense        |
| NDBE_08 | Never-dysplastic BE | SMARCA4  | chr19 | 11141499  | G    | A  | missense        |
| NDBE_09 | Never-dysplastic BE | SEMA5A   | chr5  | 9197365   | G    | A  | missense        |
| NDBE_10 | Never-dysplastic BE | CDKN2A   | chr9  | 21970971  | G    | T  | Nonsense        |
| NDBE_10 | Never-dysplastic BE | MYO18B   | chr22 | 26291140  | C    | T  | missense        |
| NDBE_10 | Never-dysplastic BE | MYF6     | chr12 | 81101695  | -    | G  | Frame_shift_INS |
| NDBE_11 | Never-dysplastic BE | CDKN2A   | chr9  | 21971186  | G    | A  | Nonsense        |
| NDBE_12 | Never-dysplastic BE | MYF6     | chr12 | 81102313  | C    | T  | missense        |
| NDBE_12 | Never-dysplastic BE | TRAF3    | chr14 | 103371607 | G    | A  | missense        |
| NDBE_12 | Never-dysplastic BE | CDKN2A   | chr9  | 21994319  | C    | -  | Frame_shift_Del |
| NDBE_13 | Never-dysplastic BE | CCDC102B | chr18 | 66504227  | G    | A  | missense        |
| NDBE_13 | Never-dysplastic BE | CDKN2A   | chr9  | 21974676  | C    | T  | missense        |
| NDBE_13 | Never-dysplastic BE | SMARCA4  | chr19 | 11134252  | G    | A  | missense        |

|         |                     |          |       |           |   |    |                 |
|---------|---------------------|----------|-------|-----------|---|----|-----------------|
| NDBE_14 | Never-dysplastic BE | CDKN2A   | chr9  | 21971111  | G | A  | missense        |
| NDBE_14 | Never-dysplastic BE | TRIM58   | chr1  | 248039463 | A | G  | missense        |
| NDBE_15 | Never-dysplastic BE | MYF6     | chr12 | 81101649  | G | A  | missense        |
| NDBE_15 | Never-dysplastic BE | SSTR4    | chr20 | 23016691  | C | T  | missense        |
| NDBE_15 | Never-dysplastic BE | UNC13C   | chr15 | 54529829  | C | T  | missense        |
| NDBE_16 | Never-dysplastic BE | SMARCA4  | chr19 | 11144146  | C | T  | missense        |
| NDBE_17 | Never-dysplastic BE | PNLIPRP3 | chr10 | 118236283 | A | C  | missense        |
| NDBE_18 | Never-dysplastic BE | MMP16    | chr8  | 89068483  | C | T  | missense        |
| NDBE_18 | Never-dysplastic BE | PCDH9    | chr13 | 67801669  | G | C  | missense        |
| NDBE_19 | Never-dysplastic BE | PCDH9    | chr13 | 67801805  | T | G  | missense        |
| NDBE_20 | Never-dysplastic BE | CDKN2A   | chr9  | 21971120  | G | A  | Nonsense        |
| NDBE_21 | Never-dysplastic BE | ARID1A   | chr1  | 27100943  | - | CG | Frame_shift_INS |

---

**Supplementary Table 6:** Number of mutations identified in EAC samples as well as Barrett's esophagus samples with no dysplasia (BE) and high grade dysplasia (HGD). The Fisher's Exact p value is shown (p-value) as well as the Benjamini-Hochberg adjusted p-value (BH\_adjusted p-value).

| Gene_ID  | Tumor_WT | Tumor_mutant | HGD_WT | HGD_mutant | BE_WT | BE_mutant | p-value | BH_adjusted_p-value | significant | TvHGD  | TvBE    | HGDvBE  |
|----------|----------|--------------|--------|------------|-------|-----------|---------|---------------------|-------------|--------|---------|---------|
| TP53     | 35       | 77           | 12     | 31         | 65    | 1         | <0.0001 | <0.0001             | YES         | 0.8455 | <0.0001 | <0.0001 |
| SMAD4    | 99       | 13           | 43     | 0          | 66    | 0         | 0.0005  | 0.0061              | YES         | 0.0201 | 0.0022  | 1       |
| MYO18B   | 99       | 13           | 39     | 4          | 64    | 2         | 0.1225  | 0.5473              | NO          |        |         |         |
| ARID1A   | 99       | 13           | 35     | 8          | 62    | 4         | 0.1428  | 0.5473              | NO          |        |         |         |
| SEMA5A   | 103      | 9            | 43     | 0          | 65    | 1         | 0.0406  | 0.2333              | NO          |        |         |         |
| CDKN2A   | 103      | 9            | 37     | 6          | 60    | 6         | 0.5156  | 0.8479              | NO          |        |         |         |
| TRIM58   | 105      | 7            | 43     | 0          | 65    | 1         | 0.1761  | 0.5787              | NO          |        |         |         |
| CNTNAP5  | 105      | 7            | 38     | 5          | 63    | 3         | 0.3566  | 0.7456              | NO          |        |         |         |
| ABCB1    | 105      | 7            | 41     | 2          | 65    | 1         | 0.4241  | 0.8129              | NO          |        |         |         |
| PCDH9    | 105      | 7            | 42     | 1          | 64    | 2         | 0.5161  | 0.8479              | NO          |        |         |         |
| SMARCA4  | 105      | 7            | 40     | 3          | 63    | 3         | 0.8666  | 1                   | NO          |        |         |         |
| PNLIPRP3 | 107      | 5            | 43     | 0          | 65    | 1         | 0.3365  | 0.7456              | NO          |        |         |         |
| UNC13C   | 107      | 5            | 40     | 3          | 62    | 4         | 0.7893  | 1                   | NO          |        |         |         |
| TLR4     | 108      | 4            | 38     | 5          | 66    | 0         | 0.0122  | 0.0932              | NO          |        |         |         |
| CCDC102B | 108      | 4            | 43     | 0          | 65    | 1         | 0.5928  | 0.9090              | NO          |        |         |         |
| FGF10    | 109      | 3            | 43     | 0          | 66    | 0         | 0.3037  | 0.7456              | NO          |        |         |         |
| TRAF6    | 109      | 3            | 43     | 0          | 66    | 0         | 0.3037  | 0.7456              | NO          |        |         |         |
| MYF6     | 109      | 3            | 42     | 1          | 63    | 3         | 0.8766  | 1                   | NO          |        |         |         |
| MMP16    | 110      | 2            | 43     | 0          | 65    | 1         | 1       | 1                   | NO          |        |         |         |
| SSTR4    | 110      | 2            | 43     | 0          | 65    | 1         | 1       | 1                   | NO          |        |         |         |
| MYD88    | 111      | 1            | 43     | 0          | 66    | 0         | 1       | 1                   | NO          |        |         |         |
| CCDC153  | 111      | 1            | 43     | 0          | 66    | 0         | 1       | 1                   | NO          |        |         |         |
| TRAF3    | 111      | 1            | 43     | 0          | 65    | 1         | 1       | 1                   | NO          |        |         |         |



**Supplementary table 7:** Expanded cohort for MYO18B and ARID1A. To better characterize the percentage of pre malignant lesions harboring mutations we resequenced the top two non-significantly mutated genes in our EAC cohort in a further 25 NDBE samples and 11 HGD samples giving a total of 91 NDBE and 54 HGD samples. No significant difference in mutation frequencies was observed. The Fisher's exact test p-value is shown (p-value).

| Gene_ID | Tumour_WT | Tumour_mutant | HGD_WT | HGD_mutant | BE_WT | BE_mutant | p value |
|---------|-----------|---------------|--------|------------|-------|-----------|---------|
| MYO18B  | 99        | 13            | 49     | 5          | 88    | 3         | 0.0698  |
| ARID1A  | 99        | 13            | 43     | 11         | 82    | 9         | 0.1808  |

**Supplementary table 8:** Table showing all 22 high grade BE patients for which TP53 sequencing was performed on their Cytosponge samples. For each patient that a TP53 mutation was identified, the exact base change as well as the exact location is noted, together with the allele fraction for each replicate (Freq1 and Freq2), the depth of sequencing obtained for the base in question, the expected variant allele fraction for the two replicates as well as the observed allele fractions. NS = nonsynonymous, HGD = High grade dysplasia.

|             | Diagnosis | Exonic | Type               | Chr | Position | Ref | Mut | Freq1 | Freq2 | Ave Freq | medianFreq | Depth1 | Depth2 | Expected1 | Expected2 | Observed1 | Observed2 |
|-------------|-----------|--------|--------------------|-----|----------|-----|-----|-------|-------|----------|------------|--------|--------|-----------|-----------|-----------|-----------|
| Cyto_HGD_1  | HGD       | exonic | NS                 | 17  | 7578403  | C   | A   | 0.113 | 0.077 | 0.095    | 0          | 373    | 416    | 0.043882  | 0.048941  | 42        | 32        |
| Cyto_HGD_2  | HGD       | -      | -                  | -   | -        | -   | -   | -     | -     | -        | -          | -      | -      | -         | -         | -         | -         |
| Cyto_HGD_3  | HGD       | -      | -                  | -   | -        | -   | -   | -     | -     | -        | -          | -      | -      | -         | -         | -         | -         |
| Cyto_HGD_4  | HGD       | exonic | NS                 | 17  | 7577121  | G   | A   | 0.167 | 0.155 | 0.161    | 0          | 935    | 865    | 4.3287    | 4.0046    | 156       | 134       |
| Cyto_HGD_5  | HGD       | exonic | FS                 | 17  | 7578458  |     |     |       |       |          |            |        |        |           |           |           |           |
| Cyto_HGD_6  | HGD       | exonic | stopgain<br>INDEL, | 17  | 7578524  | G   | A   | 0.018 | 0.009 | 0.0135   | 0          | 9792   | 2533   | 1.3663    | 0.35344   | 176       | 23        |
| Cyto_HGD_7  | HGD       | exonic | FS                 | 17  | 7573993  |     |     |       |       |          |            |        |        |           |           |           |           |
| Cyto_HGD_8  | HGD       | exonic | NS                 | 17  | 7577580  | T   | A   | 0.019 | 0.036 | 0.0275   | 0          | 946    | 220    | 1.247     | 0.29      | 18        | 8         |
| Cyto_HGD_9  | HGD       | exonic | NS                 | 17  | 7577120  | C   | T   | 0.175 | 0.178 | 0.1765   | 0          | 1270   | 1579   | 1.7639    | 2.1931    | 222       | 281       |
| Cyto_HGD_10 | HGD       | exonic | NS                 | 17  | 7577539  | G   | A   | 0.038 | 0.022 | 0.03     | 0          | 1804   | 504    | 0.74282   | 0.20753   | 69        | 11        |
| Cyto_HGD_11 | HGD       | exonic | stopgain           | 17  | 7574003  | G   | A   | 0.156 | 0.166 | 0.161    | 0          | 1218   | 1104   | 0.27405   | 0.2484    | 190       | 183       |
| Cyto_HGD_12 | HGD       | exonic | NS                 | 17  | 7578265  | A   | G   | 0.153 | 0.152 | 0.1525   | 0          | 432    | 618    | 0         | 0         | 66        | 94        |
| Cyto_HGD_13 | HGD       | -      | -                  | -   | -        | -   | -   | -     | -     | -        | -          | -      | -      | -         | -         | -         | -         |
| Cyto_HGD_14 | HGD       | exonic | NS                 | 17  | 7577094  | G   | A   | 0.017 | 0.015 | 0.016    | 0          | 2940   | 1831   | 2.8224    | 1.7578    | 50        | 27        |
| Cyto_HGD_15 | HGD       | exonic | stopgain           | 17  | 7578263  | G   | A   | 0.01  | 0.012 | 0.011    | 0          | 3632   | 1035   | 2.1291    | 0.60672   | 36        | 12        |
| Cyto_HGD_16 | HGD       | exonic | NS                 | 17  | 7577551  | C   | T   | 0.322 | 0.391 | 0.3565   | 0          | 90     | 23     | 0         | 0         | 29        | 9         |
| Cyto_HGD_17 | HGD       | exonic | NS                 | 17  | 7578190  | T   | G   | 0.247 | 0.246 | 0.2465   | 0          | 1154   | 878    | 0         | 0         | 285       | 216       |
| Cyto_HGD_18 | HGD       | exonic | NS                 | 17  | 7577046  | C   | T   | 0.006 | 0.005 | 0.0055   | 0          | 2979   | 4171   | 1.3983    | 1.9578    | 18        | 21        |
| Cyto_HGD_19 | HGD       | exonic | NS                 | 17  | 7577085  | C   | T   | 0.205 | 0.388 | 0.2965   | 0          | 39     | 49     | 0.020893  | 0.02625   | 8         | 19        |
| Cyto_HGD_20 | HGD       | exonic | NS                 | 17  | 7578272  | G   | A   | 0.026 | 0.051 | 0.0385   | 0          | 1676   | 1403   | 0.14366   | 0.12026   | 44        | 72        |
| Cyto_HGD_21 | HGD       | exonic | NS                 | 17  | 7577121  | G   | A   | 0.047 | 0.068 | 0.0575   | 0          | 236    | 370    | 0.25567   | 0.40083   | 11        | 25        |
| Cyto_HGD_22 | HGD       | exonic | NS                 | 17  | 7577556  | C   | T   | 0.021 | 0.019 | 0.02     | 0          | 977    | 2120   | 0.11273   | 0.24462   | 21        | 40        |

**Supplementary Table 9:** Sequencing metrics for the discovery cohort. For each of the 44 samples sent for sequencing, we report the number of read pairs produced, their alignment rate with BWA and the base error rate reported by the aligner. IQR: interquartile range (from 0.025 quantile, i) 97.5 quantile. The duplication rate, optical duplicate rate and the estimated library size were obtained from PICARD. Whether our reads look like a random sample from the genome we can measure via relative entropy. A perfectly random sample with no biases or structure would give a value of zero. Since structure is more common at the start of a read, we report this measure for the first 5 bases of the read (start), and bases 31-35 (mid). We define the mappable genome as that excluding the gaps in assembly detailed in the BioConductor package Bsgenome.Hsapiens.UCSC.hg19\_1.3.17. Our coverage statistics exclude the sex chromosomes, and we give the mean depth in these regions, the proportion of these regions that are covered to at least 1x, 10x, 30x and 50x. There is naturally a particular interest in mutations within the protein coding regions, and these statistics are reported solely for such regions (as defined from Ensembl).

| Case ID | Tumor / Normal | Lanes | Read pairs ( $\times 10^9$ ) | Rate (%)  |       | Insert size median (IQR) | Duplication rate (%) |         | Library size ( $\times 10^9$ ) | Relative Entropy |         | % Q30 mapped bases | Assembled regions    |                                 |      |      |      |       | Protein coding       |                                 |      |      |      |      |
|---------|----------------|-------|------------------------------|-----------|-------|--------------------------|----------------------|---------|--------------------------------|------------------|---------|--------------------|----------------------|---------------------------------|------|------|------|-------|----------------------|---------------------------------|------|------|------|------|
|         |                |       |                              | Alignment | Error |                          | Pair                 | Optical |                                | Start            | Mid     |                    | Mapped sequence (Gb) | Mean read depth (Fold coverage) | 1x   | 10x  | 30x  | 50x   | Mapped sequence (Gb) | Mean read depth (fold coverage) | 1x   | 10x  | 30x  | 50x  |
|         |                |       |                              |           |       |                          |                      |         |                                |                  |         |                    |                      |                                 |      |      |      |       |                      |                                 |      |      |      |      |
| 3108    | N              | 6     | 1.24                         | 93.08     | 0.84  | 304 (234-384)            | 6.15                 | 0.01    | 9.02                           | 0.00551          | 0.00541 | 86.89              | 204.8                | 77.1                            | 99.9 | 99.7 | 98.9 | 93.9  | 2.83                 | 84.3                            | 99.7 | 99.3 | 98.5 | 95.4 |
| 3109    | T              | 5     | 1.02                         | 95.91     | 0.51  | 296 (211-381)            | 11.17                | 0.02    | 4.07                           | 0.00334          | 0.00208 | 90.86              | 166.5                | 62.1                            | 99.9 | 99.7 | 98.6 | 83.6  | 2.00                 | 59.5                            | 99.7 | 99.3 | 97.3 | 80.3 |
| 3110    | N              | 6     | 1.25                         | 92.57     | 0.85  | 309 (242-382)            | 7.86                 | 0.01    | 6.99                           | 0.00661          | 0.00622 | 86.79              | 206.4                | 77.4                            | 99.9 | 99.7 | 99.0 | 95.6  | 2.72                 | 81.1                            | 99.6 | 99.1 | 98.2 | 95.3 |
| 3111    | T              | 5     | 1.03                         | 95.85     | 0.51  | 295 (215-380)            | 10.6                 | 0.02    | 4.33                           | 0.00425          | 0.00285 | 90.45              | 170.0                | 63.0                            | 99.9 | 99.7 | 98.5 | 84.3  | 2.00                 | 59.0                            | 99.7 | 99.2 | 97.0 | 78.1 |
| 3112    | N              | 7     | 1.37                         | 93.79     | 0.71  | 306 (231-391)            | 6.94                 | 0.01    | 8.85                           | 0.00823          | 0.0081  | 87.56              | 230.9                | 86.8                            | 99.9 | 99.7 | 99.1 | 96.   | 3.13                 | 93.5                            | 99.5 | 99.0 | 98.3 | 96.3 |
| 3113    | T              | 5     | 0.94                         | 94.34     | 0.48  | 283 (208-358)            | 5.99                 | 0.02    | 7.11                           | 0.00646          | 0.00609 | 91.2               | 160.3                | 60.5                            | 99.9 | 99.6 | 98.2 | 78.4  | 2.14                 | 63.8                            | 99.6 | 99.1 | 97.5 | 85.7 |
| 3114    | N              | 5     | 0.94                         | 93.79     | 0.82  | 315 (235-402)            | 5.05                 | 0.01    | 8.45                           | 0.00859          | 0.00876 | 86.65              | 160.1                | 60.5                            | 99.9 | 99.6 | 97.3 | 71.8  | 2.34                 | 69.6                            | 99.7 | 99.3 | 97.8 | 84.1 |
| 3115    | T              | 5     | 0.98                         | 95.04     | 0.55  | 293 (213-383)            | 13.41                | 0.01    | 3.17                           | 0.0054           | 0.00299 | 90.2               | 157.0                | 58.1                            | 99.9 | 99.7 | 97.0 | 67.6  | 1.93                 | 57.5                            | 99.8 | 99.3 | 96.1 | 66.1 |
| 3116    | N              | 5     | 0.99                         | 94.16     | 0.79  | 301 (231-381)            | 11.92                | 0.01    | 3.59                           | 0.00581          | 0.00385 | 88.32              | 156.3                | 58.3                            | 99.9 | 99.7 | 98.5 | 81.2  | 1.89                 | 56.3                            | 99.6 | 99.0 | 96.8 | 77.7 |
| 3117    | T              | 5     | 0.97                         | 94.61     | 0.57  | 308 (223-405)            | 6.99                 | 0.02    | 6.30                           | 0.00516          | 0.00424 | 90.32              | 164.7                | 62.6                            | 99.9 | 99.7 | 98.3 | 80.4  | 2.13                 | 64.4                            | 99.7 | 99.1 | 97.4 | 85.2 |
| 3118    | N              | 6     | 1.24                         | 92.96     | 0.9   | 282 (212-357)            | 14.49                | 0.01    | 3.61                           | 0.00561          | 0.00352 | 85.96              | 191.3                | 71.2                            | 99.9 | 99.7 | 99.1 | 96.1  | 2.27                 | 67.7                            | 99.7 | 99.3 | 98.0 | 93.2 |
| 3119    | T              | 5     | 0.99                         | 95.22     | 0.5   | 307 (216-411)            | 3.98                 | 0.02    | 11.52                          | 0.00597          | 0.00624 | 90.34              | 173.3                | 65.0                            | 99.8 | 99.6 | 96.4 | 70.0  | 2.53                 | 74.8                            | 99.3 | 98.6 | 96.3 | 80.9 |
| 3120    | N              | 5     | 1.18                         | 94.35     | 0.53  | 325 (230-435)            | 4.01                 | 0.01    | 13.53                          | 0.01070          | 0.00985 | 89.02              | 205.1                | 77.7                            | 99.9 | 99.7 | 98.8 | 92.6  | 3.06                 | 91.2                            | 99.5 | 99.0 | 98.2 | 94.8 |
| 3121    | T              | 5     | 1.16                         | 94.21     | 0.62  | 330 (250-410)            | 4.73                 | 0.02    | 11.22                          | 0.01120          | 0.00926 | 88.37              | 200.2                | 75.4                            | 99.9 | 99.6 | 98.6 | 89.1  | 2.97                 | 88.0                            | 99.5 | 98.9 | 98.0 | 93.2 |
| 3124    | N              | 5     | 1.04                         | 94.87     | 0.55  | 304 (235-379)            | 8.07                 | 0.01    | 5.80                           | 0.00641          | 0.00549 | 89.43              | 174.9                | 65.6                            | 99.9 | 99.7 | 98.5 | 88.4  | 2.29                 | 68.2                            | 99.8 | 99.3 | 98.1 | 91.4 |
| 3125    | T              | 5     | 1.00                         | 95.1      | 0.51  | 305 (225-395)            | 6.81                 | 0.03    | 6.69                           | 0.00516          | 0.00471 | 90.92              | 170.4                | 64.0                            | 99.9 | 99.7 | 98.5 | 84.9  | 2.25                 | 67.2                            | 99.7 | 99.2 | 97.9 | 89.5 |
| 3128    | N              | 5     | 1.02                         | 94.47     | 0.8   | 315 (245-390)            | 4.8                  | 0.01    | 9.78                           | 0.01080          | 0.01030 | 82.22              | 174.5                | 65.8                            | 99.9 | 99.6 | 98.2 | 83.45 | 2.49                 | 74.1                            | 99.6 | 99.3 | 98.0 | 90.0 |
| 3129    | T              | 5     | 1.03                         | 95.21     | 0.55  | 277 (197-371)            | 8.67                 | 0.02    | 5.32                           | 0.00421          | 0.00298 | 90.14              | 173.6                | 61.5                            | 99.9 | 99.7 | 98.2 | 79.05 | 2.07                 | 59.6                            | 99.6 | 99.0 | 96.6 | 76.5 |
| 3130    | N              | 5     | 1.08                         | 95.14     | 0.53  | 281 (206-364)            | 8.34                 | 0.01    | 5.83                           | 0.00569          | 0.00452 | 89.87              | 181.1                | 67.7                            | 99.9 | 99.7 | 98.8 | 92.9  | 2.24                 | 66.7                            | 99.7 | 99.2 | 97.7 | 92.3 |
| 3131    | T              | 5     | 0.98                         | 94.93     | 0.49  | 314 (238-404)            | 4.94                 | 0.03    | 9.15                           | 0.00758          | 0.00773 | 91.93              | 170.3                | 64.3                            | 99.9 | 99.6 | 97.6 | 76.0  | 2.45                 | 73.6                            | 99.7 | 99.2 | 97.7 | 86.3 |
| 3132    | N              | 5     | 1.07                         | 94.82     | 0.54  | 308 (228-398)            | 6.03                 | 0.02    | 8.13                           | 0.00647          | 0.00619 | 89.57              | 184.1                | 69.3                            | 99.9 | 99.7 | 98.7 | 89.8  | 2.49                 | 74.4                            | 99.6 | 99.2 | 98.2 | 92.8 |
| 3133    | T              | 5     | 1.08                         | 94.97     | 0.5   | 297 (232-372)            | 7.48                 | 0.02    | 6.53                           | 0.00912          | 0.00416 | 91.16              | 182.9                | 68.51                           | 99.9 | 99.7 | 98.8 | 91.2  | 2.32                 | 69.4                            | 99.8 | 99.3 | 98.0 | 92.2 |
| 3134    | N              | 5     | 1.16                         | 94.55     | 0.6   | 321 (241-415)            | 4.38                 | 0.02    | 12.18                          | 0.00951          | 0.00964 | 88.15              | 201.4                | 76.0                            | 99.9 | 99.7 | 98.7 | 91.9  | 2.95                 | 88.9                            | 99.7 | 99.4 | 98.6 | 95.0 |
| 3135    | T              | 5     | 1.12                         | 94.84     | 0.57  | 326 (246-410)            | 6.42                 | 0.02    | 7.91                           | 0.00816          | 0.00721 | 89.45              | 190.1                | 71.1                            | 99.9 | 99.6 | 98.1 | 85.5  | 2.63                 | 77.                             | 99.6 | 99.0 | 97.5 | 89.2 |
| 3136    | N              | 5     | 1.05                         | 94.67     | 0.63  | 308 (218-393)            | 5.76                 | 0.01    | 8.29                           | 0.00647          | 0.00597 | 86.84              | 179.7                | 67.2                            | 99.9 | 99.7 | 98.5 | 90.5  | 2.29                 | 68.4                            | 99.8 | 99.4 | 98.1 | 92.1 |
| 3137    | T              | 5     | 0.98                         | 94.27     | 0.5   | 311 (201-433)            | 4.88                 | 0.02    | 9.15                           | 0.01050          | 0.00866 | 91.0               | 168.9                | 63.2                            | 99.9 | 99.6 | 97.4 | 73.7  | 2.46                 | 72.9                            | 99.7 | 99.2 | 97.9 | 86.1 |
| 3148    | N              | 5     | 1.09                         | 94.49     | 0.68  | 328 (233-446)            | 3.73                 | 0.02    | 13.49                          | 0.00901          | 0.00857 | 87.31              | 186.2                | 70.3                            | 99.9 | 99.7 | 98.3 | 86.0  | 2.74                 | 81.7                            | 99.7 | 99.3 | 98.2 | 91.6 |
| 3149    | T              | 5     | 1.09                         | 93.88     | 0.61  | 309 (214-409)            | 4.75                 | 0.02    | 10.45                          | 0.01170          | 0.01260 | 88.35              | 184.9                | 70.5                            | 99.8 | 99.0 | 92.9 | 75.0  | 2.78                 | 83.0                            | 99.7 | 99.1 | 96.6 | 86.9 |
| 3301    | N              | 5     | 0.92                         | 96.23     | 0.45  | 351 (221-506)            | 5.92                 | 0.03    | 7.25                           | 0.00545          | 0.00296 | 93.34              | 160.5                | 59.6                            | 99.9 | 99.7 | 98.8 | 83.8  | 1.89                 | 56.4                            | 99.9 | 99.6 | 97.6 | 76.2 |

|      |   |   |      |       |      |               |       |      |      |         |         |       |       |      |       |      |      |      |      |      |      |      |      |       |
|------|---|---|------|-------|------|---------------|-------|------|------|---------|---------|-------|-------|------|-------|------|------|------|------|------|------|------|------|-------|
| 3302 | T | 5 | 1.05 | 96.15 | 0.42 | 340 (190-530) | 5.97  | 0.02 | 8.18 | 0.00708 | 0.00247 | 92.75 | 183.7 | 68.7 | 99.9  | 99.7 | 98.5 | 79.0 | 2.19 | 66.2 | 99.7 | 98.9 | 96.1 | 73.8  |
| 3304 | N | 5 | 1.06 | 95.6  | 0.45 | 327 (142-542) | 8.37  | 0.02 | 5.73 | 0.00565 | 0.00411 | 92.83 | 178.1 | 66.1 | 99.9  | 99.8 | 99.2 | 93.5 | 2.06 | 61.5 | 99.9 | 99.6 | 98.0 | 86.3  |
| 3305 | T | 5 | 1.01 | 95.63 | 0.54 | 323 (178-495) | 7.35  | 0.01 | 6.24 | 0.00693 | 0.00347 | 89.81 | 170.8 | 62.8 | 99.9  | 99.8 | 98.9 | 83.2 | 2.13 | 62.3 | 99.9 | 99.7 | 98.0 | 80.7  |
| 3307 | N | 5 | 1.08 | 96.16 | 0.49 | 332 (202-477) | 6.85  | 0.02 | 7.26 | 0.00604 | 0.00332 | 91.42 | 186.1 | 69.1 | 99.9  | 99.7 | 99.0 | 94.7 | 2.19 | 65.4 | 99.9 | 99.5 | 98.1 | 90.8  |
| 3308 | T | 5 | 1.03 | 95.96 | 0.41 | 347 (182-572) | 9.96  | 0.04 | 4.63 | 0.00943 | 0.00284 | 93.68 | 170.2 | 63.7 | 99.93 | 99.7 | 98.9 | 85.1 | 2.03 | 60.5 | 99.6 | 98.9 | 96.3 | 79.7  |
| 3310 | N | 6 | 1.08 | 95.54 | 0.55 | 364 (261-481) | 10.71 | 0.01 | 4.46 | 0.00796 | 0.00347 | 88.61 | 172.8 | 64.2 | 99.9  | 99.8 | 99.0 | 90.9 | 2.04 | 61.0 | 99.9 | 99.7 | 98.3 | 85.47 |
| 3311 | T | 5 | 0.91 | 95.71 | 0.5  | 351 (256-493) | 6.99  | 0.02 | 5.92 | 0.00471 | 0.00305 | 90.17 | 151.0 | 56.5 | 99.9  | 99.7 | 97.6 | 64.0 | 1.85 | 55.7 | 99.9 | 99.7 | 96.8 | 60.5  |
| 3313 | N | 5 | 1.04 | 96.49 | 0.4  | 342 (212-492) | 5.22  | 0.02 | 9.29 | 0.00651 | 0.00295 | 93.33 | 178.5 | 66.3 | 99.9  | 99.8 | 99.1 | 93.2 | 2.08 | 62.2 | 99.9 | 99.5 | 97.9 | 87.64 |
| 3314 | T | 5 | 1.03 | 96.49 | 0.44 | 353 (183-546) | 5.21  | 0.03 | 9.25 | 0.00404 | 0.00246 | 93.06 | 180.9 | 67.5 | 99.9  | 99.7 | 97.0 | 81.8 | 2.33 | 68.  | 99.9 | 99.8 | 97.6 | 85.1  |
| 3316 | N | 5 | 1.01 | 95.88 | 0.39 | 331 (150-550) | 5.99  | 0.05 | 7.82 | 0.01160 | 0.00498 | 94.16 | 174.7 | 64.7 | 99.9  | 99.7 | 98.9 | 89.6 | 1.92 | 57.4 | 99.7 | 99.0 | 95.8 | 73.8  |
| 3317 | T | 5 | 1.08 | 95.69 | 0.46 | 338 (233-458) | 8.37  | 0.02 | 5.86 | 0.00618 | 0.00368 | 91.44 | 183.6 | 67.7 | 99.9  | 99.8 | 98.9 | 84.6 | 2.14 | 65.0 | 99.9 | 99.6 | 97.8 | 78.8  |
| 3319 | N | 5 | 1.09 | 95.72 | 0.48 | 362 (212-522) | 8.24  | 0.02 | 6.00 | 0.01320 | 0.00515 | 91.86 | 184.3 | 68.5 | 99.9  | 99.8 | 99.1 | 94.7 | 2.22 | 66.3 | 99.9 | 99.6 | 98.4 | 92.03 |
| 3320 | T | 5 | 0.95 | 95.71 | 0.49 | 350 (203-520) | 8.72  | 0.02 | 4.93 | 0.00609 | 0.00358 | 90.34 | 160.6 | 59.1 | 99.9  | 99.7 | 98.2 | 73.2 | 1.96 | 57.8 | 99.9 | 99.6 | 97.2 | 71.6  |
| 3322 | N | 5 | 0.97 | 95.88 | 0.42 | 355 (200-530) | 11.34 | 0.03 | 3.79 | 0.00679 | 0.00367 | 93.49 | 158.2 | 58.8 | 99.4  | 99.8 | 98.8 | 81.6 | 1.85 | 55.4 | 99.9 | 99.5 | 97.4 | 73.12 |
| 3323 | T | 5 | 0.92 | 96.27 | 0.41 | 350 (220-495) | 5.79  | 0.04 | 7.41 | 0.00596 | 0.00297 | 94.13 | 160.1 | 59.3 | 99.9  | 99.7 | 98.3 | 72.6 | 1.89 | 56.4 | 99.9 | 99.5 | 96.6 | 65.9  |

**Supplementary Table 10:** Tiles removed post-QC.

| <b>Case ID</b> | <b>Tumor/Normal</b> | <b>Flow cell</b> | <b>Lane</b> | <b>Tiles removed</b> |
|----------------|---------------------|------------------|-------------|----------------------|
| 3108           | N                   | HS2000-920_87    | 2           | 1103                 |
| 3110           | N                   | HS2000-920_87    | 4           | 2208, 2308           |
| 3118           | N                   | HS2000-920_87    | 5           | 1108                 |
| 3118           | N                   | HS2000-920_87    | 6           | 1208, 2108           |

**Supplementary Table 11:** Lanes with reads trimmed post-QC

| <b>Case ID</b> | <b>Flow cell</b> | <b>Lane</b> | <b>Read</b> | <b>Bases trimmed</b> |
|----------------|------------------|-------------|-------------|----------------------|
| 3114           | HS2000-1010_46   | 3           | 2           | 85 - 100             |
| 3116           | HS2000-645_109   | 7           | 2           | 70 - 100             |
| 3128           | HS2000-793_102   | 4           | 1           | 80 - 100             |

**Supplementary Table 12:** Per-sample coverage statistics for the callable genome. Our rules for calling somatic single nucleotide variants require a minimum of 10-fold coverage in both the tumor and germline sequencing. For each pair of samples from the discovery set, for the assembled regions in the auto chromosomal chromosomes, we report the number of bases covered to this depth in the tumor sample, the normal sample, and in both. This is also given as a percentage of the assembled region for the three cases. The percentages that would be expected if the variations in coverage of the two samples were independent are reported in the final column.

| Normal ID | Tumor ID | ≥10x in normal | ≥10x in tumor | ≥10x in both | Mappable genome size | percentage in normal | percentage in tumor | percentage in both | Percentage expected if independent |
|-----------|----------|----------------|---------------|--------------|----------------------|----------------------|---------------------|--------------------|------------------------------------|
| 3108      | 3109     | 2677470246     | 2677568854    | 2676219799   | 2684578480           | 99.74                | 99.74               | 99.69              | 99.47                              |
| 3110      | 3111     | 2677293751     | 2676993577    | 2675675217   | 2684578480           | 99.73                | 99.72               | 99.67              | 99.45                              |
| 3112      | 3113     | 2677694607     | 2676175146    | 2675513115   | 2684578480           | 99.74                | 99.69               | 99.66              | 99.43                              |
| 3114      | 3115     | 2675911765     | 2676895348    | 2674218323   | 2684578480           | 99.68                | 99.71               | 99.61              | 99.39                              |
| 3116      | 3117     | 2676751763     | 2676394568    | 2675205966   | 2684578480           | 99.71                | 99.7                | 99.65              | 99.4                               |
| 3118      | 3119     | 2678599326     | 2673847404    | 2673266814   | 2684578480           | 99.78                | 99.6                | 99.58              | 99.38                              |
| 3120      | 3121     | 2677092193     | 2676360689    | 2675551353   | 2684578480           | 99.72                | 99.69               | 99.66              | 99.42                              |
| 3124      | 3125     | 2676749324     | 2676939396    | 2675590851   | 2684578480           | 99.71                | 99.72               | 99.67              | 99.42                              |
| 3128      | 3129     | 2676382727     | 2676682610    | 2674622478   | 2684578480           | 99.69                | 99.71               | 99.63              | 99.4                               |
| 3130      | 3131     | 2677099380     | 2675246020    | 2674305225   | 2684578480           | 99.72                | 99.65               | 99.62              | 99.37                              |
| 3132      | 3133     | 2677166211     | 2677772556    | 2676296861   | 2684578480           | 99.72                | 99.75               | 99.69              | 99.47                              |
| 3134      | 3135     | 2677146070     | 2675670771    | 2674765029   | 2684578480           | 99.72                | 99.67               | 99.63              | 99.39                              |
| 3136      | 3137     | 2676470255     | 2675737311    | 2674518298   | 2684578480           | 99.7                 | 99.67               | 99.63              | 99.37                              |
| 3148      | 3149     | 2676701946     | 2658479332    | 2657761547   | 2684578480           | 99.71                | 99.03               | 99                 | 98.74                              |
| 3301      | 3302     | 2678967522     | 2677701944    | 2676509908   | 2684578480           | 99.79                | 99.74               | 99.7               | 99.54                              |
| 3304      | 3305     | 2680475788     | 2679564294    | 2678958903   | 2684578480           | 99.85                | 99.81               | 99.79              | 99.66                              |
| 3307      | 3308     | 2678621469     | 2678544268    | 2676799164   | 2684578480           | 99.78                | 99.78               | 99.71              | 99.55                              |
| 3310      | 3311     | 2679698213     | 2677434093    | 2676908392   | 2684578480           | 99.82                | 99.73               | 99.71              | 99.55                              |
| 3313      | 3314     | 2679738979     | 2678361776    | 2677334630   | 2684578480           | 99.82                | 99.77               | 99.73              | 99.59                              |
| 3316      | 3317     | 2678231813     | 2680001162    | 2677519640   | 2684578480           | 99.76                | 99.83               | 99.74              | 99.59                              |
| 3319      | 3320     | 2679435093     | 2678990848    | 2678012748   | 2684578480           | 99.81                | 99.79               | 99.76              | 99.6                               |
| 3322      | 3323     | 2679436003     | 2678101117    | 2677403328   | 2684578480           | 99.81                | 99.76               | 99.73              | 99.57                              |

**Supplementary Table 13:** List of frequently mutated genes excluded from the validation

| <b>Gene</b>   | <b>Sample count</b> | <b>Coding length</b> | <b>p-value</b> | <b>Exclusion criteria</b>           |
|---------------|---------------------|----------------------|----------------|-------------------------------------|
| KRTAP4-7      | 3                   | 465                  | 4.43E-08       | Mutations in poorly mapping regions |
| CTD-2144E22.5 | 3                   | 519                  | 6.86E-08       | Uncharacterised Protein             |
| FRG1          | 3                   | 814                  | 4.08E-07       | Mutations in poorly mapping regions |
| OR10R2        | 3                   | 1005                 | 9.38E-07       | Large gene family                   |
| MAGEC2        | 3                   | 1135                 | 1.52E-06       | Mutations in poorly mapping regions |
| DIRC3         | 2                   | 413                  | 4.16E-06       | Failed primer design                |
| CST2          | 2                   | 431                  | 4.72E-06       | Mutations in poorly mapping regions |
| ZNF730        | 3                   | 1529                 | 4.88E-06       | Mutation in poorly mapping region   |
| IVL           | 3                   | 1763                 | 8.52E-06       | Mutations in poorly mapping regions |
| REG3A         | 2                   | 553                  | 9.90E-06       | Mutation in poorly mapping region   |
| C10orf71      | 4                   | 4406                 | 1.54E-05       | Large gene family                   |



**Supplementary Table 14:** Coverage ( $\geq 100$  fold) achieved for the 26 genes screened by amplicon re-sequencing for mutations in the validation cohort.

| <b>Gene Name</b> | <b>Covered Bases</b> | <b>Targeted Region</b> | <b>Proportion of the gene covered (<math>\geq 100</math> fold)</b> |
|------------------|----------------------|------------------------|--------------------------------------------------------------------|
| ABCB1            | 3909                 | 4023                   | 0.97                                                               |
| ARID1A           | 5728                 | 6935                   | 0.83                                                               |
| CCDC102B         | 1775                 | 1849                   | 0.96                                                               |
| CCDC153          | 658                  | 658                    | 1                                                                  |
| CDKN2A           | 709                  | 860                    | 0.82                                                               |
| CNTNAP5          | 4010                 | 4010                   | 1                                                                  |
| FGF10            | 632                  | 640                    | 0.99                                                               |
| MMP16            | 1782                 | 1930                   | 0.92                                                               |
| MYD88            | 967                  | 967                    | 1                                                                  |
| MYF6             | 734                  | 734                    | 1                                                                  |
| MYO18B           | 7659                 | 7884                   | 0.97                                                               |
| PCDH9            | 3705                 | 3789                   | 0.98                                                               |
| PNLIPRP3         | 1444                 | 1445                   | 1                                                                  |
| SEMA5A           | 3146                 | 3436                   | 0.92                                                               |
| SMAD4            | 1693                 | 1803                   | 0.94                                                               |
| SMARCA4          | 4871                 | 5406                   | 0.90                                                               |
| SSTR4            | 1047                 | 1164                   | 0.90                                                               |
| TLR1             | 288                  | 2398                   | 0.12                                                               |
| TLR4             | 2423                 | 2533                   | 0.96                                                               |
| TLR7             | 744                  | 3159                   | 0.24                                                               |
| TLR9             | 949                  | 3100                   | 0.31                                                               |
| TP53             | 1254                 | 1430                   | 0.88                                                               |
| TRAF3            | 1650                 | 1772                   | 0.93                                                               |
| TRAF6            | 1594                 | 1602                   | 1                                                                  |
| TRIM58           | 1303                 | 1478                   | 0.88                                                               |
| UNC13C           | 6485                 | 6845                   | 0.95                                                               |

**Supplementary Table 15:** p53 primers used in the p53 multiplex assay. All forward primers contained the CS1 sequence (5'- ACACTGACGACATGGTTCTACA – 3') and all the reverse primers contained the CS2 sequence (5'- TACGGTAGCAGAGACTTGGTCT – 3') in order to allow the addition of a unique barcode as well as the Illumina adapter sequence in the second PCR.

| Target Specific – Forward                      | Target Specific - Reverse                   |
|------------------------------------------------|---------------------------------------------|
| ACACTGACGACATGGTTCTACAGACCCAAAACCCAAAATGGC     | TACGGTACGAGAGACTTGGTCTTCCCTGCTTCTGTCTCTAC   |
| ACACTGACGACATGGTTCTACACTGGTGTGTTGGGCAGT        | TACGGTACGAGAGACTTGGTCTATCTCCGCAAGAAAGGGGAG  |
| ACACTGACGACATGGTTCTACATCCAATACTCCACACGCAAA     | TACGGTACGAGAGACTTGGTCTGCTGCCCCACCATGAG      |
| ACACTGACGACATGGTTCTACATGTGCTGTGACTGCTTGATG     | TACGGTACGAGAGACTTGGTCTTGCCTGACTTTCAACTCTGT  |
| ACACTGACGACATGGTTCTACAGGAAACCGTAGCTGCCCTG      | TACGGTACGAGAGACTTGGTCTAAGACCCAGGTCCAGATGAA  |
| ACACTGACGACATGGTTCTACAGGAATCCTATGGCTTTCCAACC   | TACGGTACGAGAGACTTGGTCTCCCCCTCCTCTGTTGCTG    |
| ACACTGACGACATGGTTCTACATCTGTATCAGGCAAAGTCATAGAA | TACGGTACGAGAGACTTGGTCTGCCTCAAAGACAATGGCTCC  |
| ACACTGACGACATGGTTCTACAAGAAAACGGCATTGAGTGT      | TACGGTACGAGAGACTTGGTCTAAGGGTGCAGTTATGCCTCA  |
| ACACTGACGACATGGTTCTACATGTCTGCTTGCTTACCTCG      | TACGGTACGAGAGACTTGGTCTGCCTCTTGCTTCTCTTTTCCT |
| ACACTGACGACATGGTTCTACAGGGGTCAGAGGCAAGCAG       | TACGGTACGAGAGACTTGGTCTTGGGCCTGTGTTATCTCC    |
| ACACTGACGACATGGTTCTACAGAGAAAGCCCCCTACTGC       | TACGGTACGAGAGACTTGGTCTAGCATCTTATCCGAGTGAAGG |
| ACACTGACGACATGGTTCTACAAGCTGCTCACCATCGCTA       | TACGGTACGAGAGACTTGGTCTCCAAGTGGCCAAGACCT     |
| ACACTGACGACATGGTTCTACAATACGGCCAGGCATTGAAGT     | TACGGTACGAGAGACTTGGTCTCCTCCTGGCCCCCTGTC     |
| ACACTGACGACATGGTTCTACACAGCCTCTGGCATTCTGG       | TACGGTACGAGAGACTTGGTCTCCTGGTCTCTGACTGCTCT   |

**Supplementary Table 16:** Genomic co-ordinates (hg19) that each of the p53 primers used in the p53 multiplex assay amplify

| Gene | chr   | amp_start | amp_end | Called  | Pool   |
|------|-------|-----------|---------|---------|--------|
| TP53 | chr17 | 7572850   | 7573030 | TP53_1  | Pool 1 |
| TP53 | chr17 | 7576908   | 7577075 | TP53_5  | Pool 1 |
| TP53 | chr17 | 7578229   | 7578406 | TP53_9  | Pool 1 |
| TP53 | chr17 | 7578425   | 7578594 | TP53_11 | Pool 1 |
| TP53 | chr17 | 7579359   | 7579520 | TP53_13 | Pool 1 |
| TP53 | chr17 | 7573859   | 7574054 | TP53_2  | Pool 2 |
| TP53 | chr17 | 7576584   | 7576734 | TP53_3  | Pool 2 |
| TP53 | chr17 | 7576786   | 7576983 | TP53_4  | Pool 2 |
| TP53 | chr17 | 7577003   | 7577187 | TP53_6  | Pool 2 |
| TP53 | chr17 | 7577432   | 7577631 | TP53_7  | Pool 2 |
| TP53 | chr17 | 7578091   | 7578274 | TP53_8  | Pool 2 |
| TP53 | chr17 | 7578361   | 7578525 | TP53_10 | Pool 2 |
| TP53 | chr17 | 7579260   | 7579421 | TP53_12 | Pool 2 |
| TP53 | chr17 | 7579479   | 7579626 | TP53_14 | Pool 2 |

**Supplementary Table 17:** Sequences of the Fluidigm barcode primers containing PE1 in the forward primer and PE2 and the unique barcode (BC) in the reverse primer.

| Primer     | Sequence                                                    |
|------------|-------------------------------------------------------------|
| PE1-CS1    | 5'-AATGATACGGCGACCACCGAGATCTACACTGACGACATGGTTCTACA-3'       |
| PE2-BC-CS2 | 5'-CAAGCAGAAGACGGCATAACGAGAT-[BC]-TACGGTAGCAGAGACTTGGTCT-3' |
